# Supplementary material for: A functional connectome: regulation of Wnt/TCF-dependent transcription by pairs of pathway activators
Source: PubMed Central journal article supplement (PMC4672529; doi:10.1186/s12943-015-0475-1), 2015-12-08
Supplement: 12943_2015_475_MOESM2_ESM.pdf [file 12943_2015_475_MOESM2_ESM.pdf]

| ACTIVATORS                |                   |                      |
|---------------------------|-------------------|----------------------|
| BLAST homologue gene name | Fold of deltaNLRP | p-value vs deltaNLRP |
| PRUNE2                    | 12.73             | 2.06E-03             |
| HRAS                      | 28.49             | 5.48E-29             |
| xCG8359-PA                | 2.47              | 1.87E-04             |
| CSNK1E                    | 6.05              | 5.15E-15             |
| SLC12AB                   | 5.72              | 1.11E-13             |
| SOX21                     | 11.36             | 2.06E-24             |
| EMX2                      | 3.88              | 5.70E-08             |
| RBM5                      | 3.03              | 1.64E-06             |
| Myb protein P42POP        | 3.22              | 3.97E-06             |
| GSC                       | 3.80              | 1.63E-12             |
| SNAI2                     | 2.13              | 5.26E-04             |
| IRX3                      | 4.18              | 4.27E-08             |
| HMGB1                     | 16.06             | 3.73E-11             |
| MNBH                      | 1.81              | 8.24E-03             |
| xNRAS                     | 35.64             | 6.60E-22             |
| HDGF                      | 24.15             | 4.11E-30             |
| ZFAND6                    | 6.88              | 1.91E-15             |
| HMGB3                     | 5.82              | 1.04E-12             |
| FOXP1                     | 3.54              | 9.42E-11             |
| CTSO                      | 9.04              | 2.74E-12             |
| UBE2E3                    | 2.29              | 1.67E-04             |
| WHSC1                     | 3.54              | 4.77E-10             |
| DVL2                      | 3.94              | 5.13E-09             |
| HMX2                      | 8.43              | 2.22E-25             |
| NKX6-2                    | 5.28              | 4.38E-14             |
| xZNF317                   | 2.50              | 2.64E-06             |
| xZNF300                   | 1.88              | 2.82E-03             |
| xZNF616                   | 2.95              | 5.87E-08             |
| xSON                      | 2.33              | 4.24E-05             |
| CSNK1D                    | 5.15              | 8.01E-14             |
| TPX2                      | 1.99              | 8.77E-04             |
| EMX1                      | 2.50              | 2.63E-06             |
| MAP3K7IP2                 | 1.91              | 7.00E-03             |
| FBL                       | 2.79              | 7.62E-06             |
| xZNF33A                   | 2.42              | 2.92E-05             |
| MIDN                      | 2.07              | 9.05E-04             |
| TGIF1                     | 2.71              | 1.11E-09             |
| RABEPK                    | 2.49              | 3.86E-08             |
| MESPA                     | 3.20              | 7.78E-07             |
| P2RY2                     | 3.12              | 1.94E-11             |
| WDR5                      | 5.05              | 1.41E-11             |
| Novel Zinc Finger         | 4.50              | 5.13E-16             |
| CCDC18                    | 2.63              | 4.11E-06             |
| xKRAS2                    | 8.52              | 1.80E-07             |
| NUCKS1                    | 3.11              | 1.32E-05             |

Supp Table 1

| INHIBITORS                           |                   |                       |
|--------------------------------------|-------------------|-----------------------|
| BLAST homologue gene name            | Fold of deltaNLRP | p-value vs. deltaNLRP |
| HES-1                                | 0.01              | 1.32E-04              |
| GPR107                               | 0.11              | 5.12E-04              |
| FOXA2                                | 0.09              | 3.76E-04              |
| HIST1H2AM                            | 0.09              | 9.55E-05              |
| RHOA                                 | 0.20              | 1.70E-03              |
| HTPAP                                | 0.16              | 9.33E-04              |
| SERINC3                              | 0.14              | 7.22E-04              |
| CHCHD4                               | 0.03              | 1.75E-04              |
| EBAG9                                | 0.11              | 4.90E-04              |
| CASP10                               | 0.21              | 1.67E-03              |
| ARL8A                                | 0.33              | 7.15E-03              |
| CDC25A                               | 0.15              | 8.02E-04              |
| AXIN2                                | 0.02              | 1.57E-04              |
| xCHMP1                               | 0.36              | 8.71E-03              |
| CDC42BPB                             | 0.06              | 2.68E-04              |
| MRCKB                                | 0.12              | 5.81E-04              |
| TSPAN3                               | 0.06              | 6.46E-05              |
| PHB                                  | 0.07              | 2.73E-04              |
| RPN1                                 | 0.00              | 1.16E-04              |
| WDR82                                | 0.27              | 3.52E-03              |
| MGA3                                 | 0.04              | 1.87E-04              |
| xTMEM150                             | 0.15              | 7.93E-04              |
| TMEM165                              | 0.06              | 2.48E-04              |
| STX5                                 | 0.08              | 3.34E-04              |
| xSLC27A6                             | 0.17              | 1.18E-03              |
| PEX11B                               | 0.21              | 1.80E-03              |
| SCAP                                 | 0.25              | 2.89E-03              |
| TMEM59                               | 0.10              | 4.07E-04              |
| FUBP1                                | 0.07              | 2.93E-04              |
| HGS                                  | 0.24              | 2.22E-03              |
| No hits                              | 0.16              | 9.54E-04              |
| FAM57A                               | 0.03              | 1.78E-04              |
| T - Brachyury protein                | 0.16              | 9.55E-04              |
| THOC4                                | 0.01              | 1.34E-04              |
| TBPL1                                | 0.15              | 8.47E-04              |
| Novel Protein                        | 0.09              | 3.94E-04              |
| SCOTIN                               | 0.10              | 4.54E-04              |
| CLCN5                                | 0.26              | 3.45E-03              |
| Novel protein similar to X-epilectin | 0.06              | 6.31E-05              |
| xCG6282-PA                           | 0.01              | 1.29E-04              |
| HSPA13                               | 0.03              | 1.81E-04              |
| POFUT1                               | 0.00              | 1.16E-04              |
| Novel 7 transmembrane receptor       | 0.09              | 3.61E-04              |
| TMEM101                              | 0.00              | 1.16E-04              |
| xUGT3A1                              | 0.09              | 3.89E-04              |
| SOX7                                 | 0.00              | 1.16E-04              |
| DLX2                                 | 0.02              | 1.55E-04              |
| SRRP35                               | 0.05              | 2.13E-04              |
| xFUCOLECTIN                          | 0.24              | 2.18E-03              |
| HIST2H2AB                            | 0.20              | 1.50E-03              |
| CHSY1                                | 0.14              | 7.17E-04              |
| ATX                                  | 0.03              | 1.79E-04              |
| RUNX2                                | 0.08              | 3.56E-04              |
| CFHR1                                | 0.00              | 1.16E-04              |
| WIPF2                                | 0.17              | 1.14E-03              |
| CANT1                                | 0.07              | 2.80E-04              |
| SOX17                                | 0.05              | 1.94E-03              |
| xPRS1                                | 0.24              | 3.07E-03              |
| EFEMP2                               | 0.05              | 2.23E-04              |
| TSKU                                 | 0.35              | 8.04E-03              |
| UPK1                                 | 0.05              | 1.89E-03              |
| ALCAM                                | 0.06              | 2.59E-04              |
| PRPF3                                | 0.26              | 3.07E-03              |
| RPS3                                 | 0.21              | 1.62E-03              |
| TFAP2B                               | 0.21              | 1.67E-03              |
| RBM24                                | 0.28              | 3.74E-03              |
| BAT3                                 | 0.36              | 9.37E-03              |
| NOL12                                | 0.14              | 6.87E-04              |
| Arachidonate 5-lipoxygenase variant  | 0.26              | 2.99E-03              |
| CCDC18                               | 0.24              | 2.36E-03              |
| xMGC84823                            | 0.15              | 7.53E-04              |
| LH3                                  | 0.18              | 1.12E-03              |
| TSC1                                 | 0.28              | 3.75E-03              |
| IDH2                                 | 0.20              | 1.55E-03              |
| STX10                                | 0.03              | 1.62E-04              |
| xTMEM46                              | 0.12              | 1.40E-04              |
| xWS1                                 | 0.11              | 1.24E-04              |
| SERINC5                              | 0.13              | 5.11E-04              |
| SFRS3                                | 0.54              | 6.52E-03              |
| RXR-beta                             | 0.28              | 1.23E-03              |
| CACNA2D2                             | 0.08              | 5.40E-03              |
| DLX3                                 | 0.07              | 7.04E-05              |
| SLC35A3                              | 0.12              | 7.07E-03              |
| POU5F1                               | 0.07              | 4.53E-03              |
| DERL1                                | 0.13              | 8.01E-03              |
| ZNT6                                 | 0.24              | 9.64E-04              |
| FOXI1                                | 0.23              | 2.99E-04              |
| xMGC154907                           | 0.52              | 3.10E-05              |
| YTHDF2                               | 0.36              | 1.03E-05              |
| LACI                                 | 0.18              | 3.15E-06              |
| ST3GAL2                              | 0.18              | 1.71E-04              |
| CDC42EP2                             | 0.15              | 9.11E-03              |
| MEX3C                                | 0.30              | 8.28E-04              |
| OTX2                                 | 0.42              | 1.30E-03              |
| LYSMD2                               | 0.06              | 2.33E-04              |
| ZNF395                               | 0.35              | 7.12E-03              |
