# Supplementary material for: A functional connectome: regulation of Wnt/TCF-dependent transcription by pairs of pathway activators
Source: PubMed Central journal article supplement (PMC4672529; doi:10.1186/s12943-015-0475-1), 2015-12-08
Supplement: 12943_2015_475_MOESM3_ESM.pdf [file 12943_2015_475_MOESM3_ESM.pdf]

Supp Table 2

| Gene    | Fold of deltaNLRP | Axis Duplication Assay |                                                                                      | Target gene activation |      |
|---------|-------------------|------------------------|--------------------------------------------------------------------------------------|------------------------|------|
|         |                   | n                      | Phenotype                                                                            | Siamois                | Xnr3 |
| PRUNE2  | 12.73             | 20                     | 3 partial axis duplication                                                           | +                      | NT   |
| HMX2    | 6.57              | 21                     | 3 complete axis duplication<br>1 partial axis duplication<br>17 anteriorised embryos | ++                     | ++   |
| HMGB3   | 6.12              | 26                     | 4 complete axis duplication<br>4 anteriorised embryos                                | ++                     | ++   |
| HRAS    | 22.13             | 34                     | 2 complete axis duplication<br>17 anteriorised embryos                               | NT                     | NT   |
| EMX2    | 3.88              | 35                     | 6 complete axis duplication<br>2 partial axis duplication<br>7 anteriorised embryos  | ++                     | ++   |
| HMGB1   | 16.06             | 18                     | 1 complete axis duplication<br>4 partial axis duplication                            | ++                     | ++   |
| HDGF    | 24.15             | 20                     | 3 complete axis duplication<br>3 partial axis duplication                            | ++                     | ++   |
| xZNF616 | 2.95              | 8                      | 3 complete axis duplication                                                          | NT                     | NT   |
| MESPA   | 3.2               | 40                     | 2 partial axis duplication                                                           | NT                     | NT   |
| KRAS2   | 8.52              | 23                     | 2 partial axis duplication                                                           | -                      | NT   |
