# Supplementary material for: A functional connectome: regulation of Wnt/TCF-dependent transcription by pairs of pathway activators
Source: PubMed Central journal article supplement (PMC4672529; doi:10.1186/s12943-015-0475-1), 2015-12-08
Supplement: 12943_2015_475_MOESM4_ESM.pdf [file 12943_2015_475_MOESM4_ESM.pdf]

Supp Table 3

| ACTIVATORS        |                             |
|-------------------|-----------------------------|
| Gene              | HCT 116<br>Fold of TOPflash |
| PRUNE2            | 2.84                        |
| HRAS              | 1.28                        |
| xCG8359-PA        | 0.96                        |
| CSNK1E            | 3.53                        |
| SLC12A8           | 1.71                        |
| SOX21             | 1.89                        |
| EMX2              | 3.31                        |
| RBM5              | 1.16                        |
| P42POP            | 1.60                        |
| GSC               | 2.90                        |
| SNAI2             | 0.95                        |
| IRX3              | 4.87                        |
| HMGB1             | 1.16                        |
| MNBH              | 0.81                        |
| xNRAS             | 0.84                        |
| HDGF              | 2.10                        |
| ZFAND6            | 0.86                        |
| HMGB3             | 1.12                        |
| FOXP1             | 4.23                        |
| CTSO              | 1.07                        |
| UBE2E3            | 0.92                        |
| WHSC1             | 1.16                        |
| DVL2              | 1.47                        |
| HMX2              | 2.41                        |
| NKX6-2            | 2.42                        |
| xZNF317           | 1.11                        |
| xZNF300           | 1.37                        |
| xZNF616           | 1.13                        |
| xSON              | 0.98                        |
| CSNK1D            | 3.18                        |
| TPX2              | 0.92                        |
| EMX1              | 4.22                        |
| MAP3K7IP2         | 1.00                        |
| FBL               | 0.60                        |
| xZNF33A           | 1.10                        |
| MIDN              | 1.06                        |
| TGIF1             | 1.59                        |
| RABEPK            | 1.24                        |
| MESPA             | 0.61                        |
| P2RY2             | 0.74                        |
| WDR5              | 0.93                        |
| Novel Zinc Finger | 1.37                        |
| CCDC18            | 1.01                        |
| xKRAS2            | 0.87                        |
| NUCKS1            | 0.65                        |

| INHIBITORS                           |                             |                           |
|--------------------------------------|-----------------------------|---------------------------|
| Gene                                 | HCT 116<br>Fold of TOPflash | SW480<br>Fold of TOPflash |
| HES-1                                | 1.12                        | 0.76                      |
| GPR107                               | 0.49                        | 0.65                      |
| FOXA2                                | 0.52                        | 0.37                      |
| HIST1H2AM                            | 0.41                        | 0.65                      |
| RHOA                                 | 0.74                        | 0.67                      |
| HTPAP                                | 0.64                        | 0.72                      |
| SERINC3                              | 0.54                        | 0.77                      |
| CHCHD4                               | 0.71                        | 0.48                      |
| EBAG9                                | 0.80                        | 0.76                      |
| CASP10                               | 1.02                        | 0.46                      |
| ARL8A                                | 0.95                        | 0.64                      |
| CDC25A                               | 1.15                        | 0.91                      |
| AXIN2                                | 0.52                        | 0.47                      |
| xCHMP1                               | 0.74                        | 0.96                      |
| CDC42BPB                             | 1.08                        | 0.60                      |
| MRCKB                                | 0.45                        | 0.61                      |
| TSPAN3                               | 0.76                        | 0.66                      |
| PHB                                  | 0.80                        | 0.50                      |
| RPN1                                 | 1.15                        | 0.49                      |
| WDR82                                | 0.77                        | 0.59                      |
| MGA3                                 | 0.72                        | 0.52                      |
| xTMEM150                             | 1.31                        | 0.45                      |
| TMEM165                              | 1.20                        | 0.72                      |
| STX5                                 | 1.20                        | 0.85                      |
| xSLC27A6                             | 0.92                        | 0.72                      |
| PEX11B                               | 0.40                        | 1.03                      |
| SCAP                                 | 1.03                        | 0.62                      |
| TMEM59                               | 0.99                        | 0.63                      |
| FUBP1                                | 1.38                        | 1.20                      |
| HGS                                  | 1.43                        | 0.69                      |
| No hits                              | 1.17                        | 0.62                      |
| FAM57A                               | 0.95                        | 0.77                      |
| T - Brachyury protein                | 1.24                        | 0.51                      |
| THOC4                                | 1.49                        | 1.38                      |
| TBPL1                                | 0.24                        | 0.45                      |
| Novel Protein                        | 0.87                        | 0.92                      |
| SCOTIN                               | 0.91                        | 0.66                      |
| CLCN5                                | 0.99                        | 0.77                      |
| Novel protein similar to X-epilectin | 0.65                        | 0.42                      |
| xCG6282-PA                           | 0.82                        | 0.70                      |
| HSPA13                               | 1.22                        | 0.49                      |
| POFUT1                               | 1.17                        | 0.53                      |
| Novel 7 transmembrane receptor       | 0.79                        | 0.73                      |
| TMEM101                              | 0.93                        | 0.75                      |
| xUGT3A1                              | 1.14                        | 0.61                      |
| SOX7                                 | 1.11                        | 0.87                      |
| DLX2                                 | 1.02                        | 0.80                      |
| SRRP35                               | 1.56                        | 1.16                      |
| xFUCOLECTIN                          | 1.25                        | 0.75                      |
| HIST2H2AB                            | 0.81                        | 0.60                      |
| CHSY1                                | 1.56                        | 0.70                      |
| ATX                                  | 0.84                        | 0.91                      |
| RUNX2                                | 0.93                        | 0.60                      |
| CFHR1                                | 1.38                        | 0.54                      |
| WIPF2                                | 1.50                        | 0.73                      |
| CANT1                                | 1.61                        | 0.38                      |
| SOX17                                | 1.10                        | 0.58                      |
| xPRS1                                | 0.94                        | 1.00                      |
| EFEMP2                               | 0.72                        | 0.56                      |
| TSKU                                 | 1.32                        | 0.97                      |
| UPK1                                 | 0.67                        | 0.58                      |
| ALCAM                                | 1.43                        | 0.50                      |
| PRPF3                                | 1.16                        | 0.67                      |
| RPS3                                 | 0.86                        | 0.56                      |
| TFAP2B                               | 0.87                        | 0.70                      |
| RBM24                                | 3.64                        | 0.95                      |
| BAT3                                 | 1.49                        | 0.72                      |
| NOL12                                | 0.91                        | 1.02                      |
| Arachidonate 5-lipoxygenase variant  | 1.14                        | 0.72                      |
| CCDC18                               | 0.69                        | 0.65                      |
| xMGC84823                            | 0.89                        | 0.63                      |
| LH3                                  | 0.70                        | 0.42                      |
| TSC1                                 | 0.87                        | 0.57                      |
| IDH2                                 | 0.44                        | 0.31                      |
| STX10                                | 1.05                        | 0.42                      |
| xTMEM46                              | 0.39                        | 0.75                      |
| xWS1                                 | 0.51                        | 0.55                      |
| SERINC5                              | 0.78                        | 0.30                      |
| SFRS3                                | 0.45                        | 0.50                      |
| RXR-beta                             | 0.27                        | 0.34                      |
| CACNA2D2                             | 0.57                        | 0.56                      |
| DLX3                                 | 1.22                        | 0.29                      |
| SLC35A3                              | 0.15                        | 0.68                      |
| POU5F1                               | 0.76                        | 0.37                      |
| DERL1                                | 1.12                        | 0.49                      |
| ZNT6                                 | 0.67                        | 0.48                      |
| FOXI1                                | 1.45                        | 0.41                      |
| xMGC154907                           | 1.03                        | 0.33                      |
| YTHDF2                               | 0.70                        | 0.40                      |
| LAC1                                 | 0.77                        | 0.44                      |
| ST3GAL2                              | 0.79                        | 0.37                      |
| CDC42EP2                             | 1.43                        | 0.62                      |
| MEX3C                                | 1.22                        | 0.44                      |
| OTX2                                 | 1.15                        | 0.46                      |
| LYSMD2                               | 1.54                        | 0.72                      |
| ZNF395                               | 0.72                        | 0.34                      |
