# Supplementary material for: A functional connectome: regulation of Wnt/TCF-dependent transcription by pairs of pathway activators
Source: PubMed Central journal article supplement (PMC4672529; doi:10.1186/s12943-015-0475-1), 2015-12-08
Supplement: 12943_2015_475_MOESM5_ESM.pdf [file 12943_2015_475_MOESM5_ESM.pdf]

Supp Table 4

| cDNA               | 2 tail Kstest vs. Background pval | individual luminescence distribution mean |
|--------------------|-----------------------------------|-------------------------------------------|
| VP16-TCF           | 4.67E-34                          | 0.93741                                   |
| VP16-minTCF        | 1.35E-39                          | 71.6452                                   |
| AxinGID            | 1.35E-39                          | 5.5356                                    |
| deltaNbetaCAT      | 2.18E-21                          | 0.82662                                   |
| PRUNE2             | 1.17E-50                          | 7.2291                                    |
| HRAS               | 0.2527                            | 0.082585                                  |
| xCG8359-PA         | 0.040247                          | 0.069695                                  |
| CSNK1E             | 3.64E-16                          | 0.40181                                   |
| SLC12A8            | 0.17065                           | 0.090698                                  |
| SOX21              | 0.20693                           | 0.10837                                   |
| EMX2               | 0.31411                           | 0.11068                                   |
| RBM5               | 0.0027637                         | 0.03988                                   |
| Myb protein P42POP | 0.00020805                        | 0.032569                                  |
| GSC                | 0.042257                          | 0.054336                                  |
| SNAI2              | 0.16538                           | 0.079256                                  |
| IRX3               | 0.12947                           | 0.071123                                  |
| HMGB1              | 0.092278                          | 0.10919                                   |
| MNBH               | 0.0052904                         | 0.044614                                  |
| xNRAS              | 0.37724                           | 0.14001                                   |
| HDGF               | 0.041071                          | 0.17337                                   |
| ZFAND6             | 0.60228                           | 0.6814                                    |
| HMGB3              | 0.36769                           | 0.15892                                   |
| FOXP1              | 0.061325                          | 0.36794                                   |
| CTSO               | 0.33106                           | 0.19178                                   |
| UBE2E3             | 0.74964                           | 0.086688                                  |
| WHSC1              | 0.3935                            | 0.13748                                   |
| DVL2               | 8.39E-47                          | 4.0706                                    |
| HMX2               | 0.40681                           | 0.071941                                  |
| NKX6-2             | 0.46803                           | 0.13599                                   |
| xZNF317            | 0.7913                            | 0.11385                                   |
| xZNF300            | 0.30946                           | 0.15351                                   |
| xZNF616            | 0.055061                          | 0.070659                                  |
| xSON               | 0.42899                           | 0.13568                                   |
| CSNK1D             | 0.0090535                         | 0.16577                                   |
| TPX2               | 0.14774                           | 0.10531                                   |
| EMX1               | 0.68849                           | 0.13841                                   |
| MAP3K7IP2          | 0.8541                            | 0.089736                                  |
| FBL                | 0.44298                           | 0.069187                                  |
| xZNF33A            | 0.40179                           | 0.074135                                  |
| MIDN               | 0.19543                           | 0.12543                                   |
| TGIF1              | 0.67447                           | 0.10139                                   |
| RABEPK             | 0.89054                           | 0.094314                                  |
| MESPA              | 4.19E-09                          | 0.44644                                   |
| P2RY2              | 0.74709                           | 0.10727                                   |

|                   |         |          |
|-------------------|---------|----------|
| WDR5              | 0.18635 | 0.095215 |
| Novel Zinc Finger | 0.17847 | 0.072922 |
| CCDC18            | 0.12018 | 0.051403 |
| xKRAS2            | 0.74709 | 0.12165  |
| NUCKS1            | 0.38118 | 0.08982  |
